# Supplementary material for: Small molecule-nanobody conjugate induced proximity controls intracellular processes and modulates endogenous unligandable targets
Source: PubMed Central journal article supplement (PMC10039045; doi:10.1038/s41467-023-37237-x), 2023-03-24
Supplement: 41467_2023_37237_MOESM2_ESM.pdf [file 41467_2023_37237_MOESM2_ESM.pdf]

## **Description of Additional Supplementary Files**

**Title:** Supplementary Data 1

**Description:** The Supplementary Data 1 file lists the primer sequences of the primers used for construction of plasmids in the study that involve PCR amplifications, or site-directed mutagenesis.

**Title:** Supplementary Software

**Description:** This Supplementary Software contains the "Manders\_Coefficients.class" plugin for analysis of PCC value, and illustration of how to use it is also included.
